# Supplementary material
Source: Springer Nature journal article supplement (https://www.springermedizin.de/resource/supplementary/12865_2008_227_MOESM1_ESM.pdf/9427678)

**Undigested WPC**

**Undigested Enprocal**

**4 Hours digested Enprocal**

**4 Hours digested WPC**

**Mol Wt marker**

**KDa**

**250**

**150**

**100**

**75**

**50**

**37**

**25**

**20**

**15**

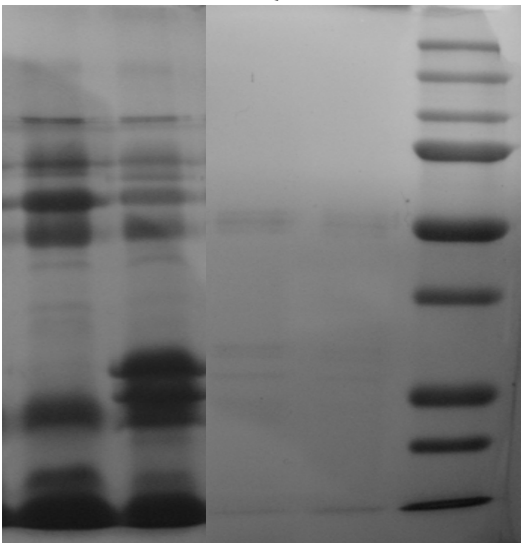

Supplement: MOESM1 [file 9427678]
